# Supplementary material for: Cannabinoid-Induced Inhibition of Morphine Glucuronidation and the Potential for In Vivo Drug–Drug Interactions
Source: MDPI journal article supplement (doi:10.3390/pharmaceutics16030418), 2024-03-18
Supplement: s1 [file s1]

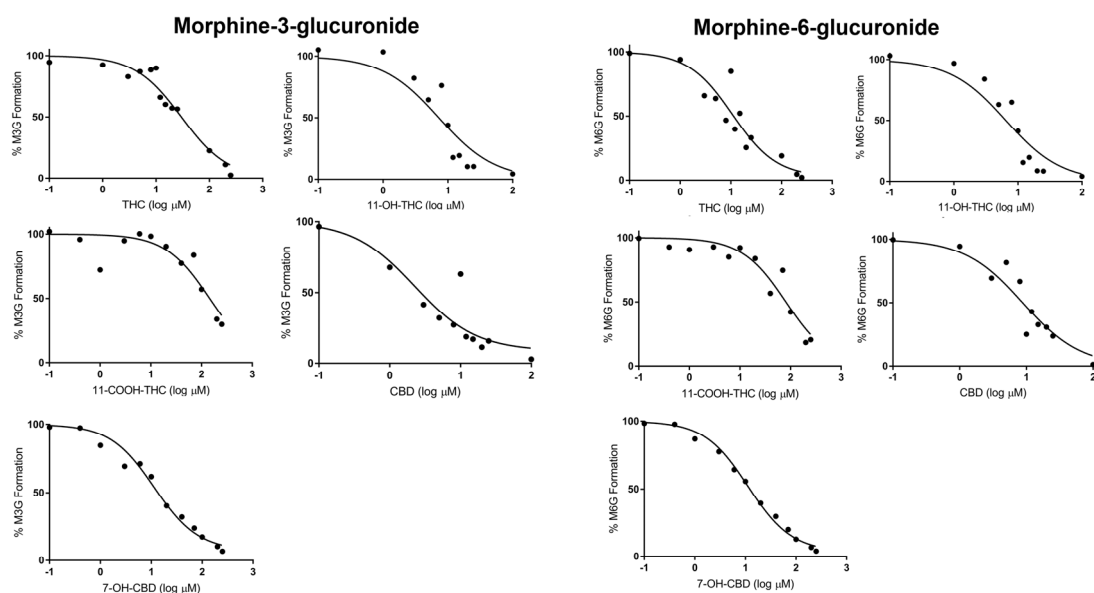

**Figure S1:** Representative IC<sub>50</sub> curves in HLM against morphine-3-glucuronide and morphine-6-glucuronide formation

**Table S1.** Estimated maximum plasma concentrations of THC and CBD and their metabolites used to predict the magnitude of *in vivo* cannabinoid – drug interactions after consumption of cannabis by either oral or inhalation route.

| Cannabinoid | Dose (mg) <sup>a</sup> | Route of Administration | C <sub>max,hepatic inlet,u</sub> (μM) |
|-------------|------------------------|-------------------------|---------------------------------------|
| THC         | 20                     | Oral                    | 0.03                                  |
|             | 130                    | Oral                    | 0.20                                  |
|             | 160                    | Oral                    | 0.24                                  |
|             | 25                     | Inhalation              | 0.25                                  |
|             | 70                     | Inhalation              | 0.69                                  |
|             | 100                    | Inhalation              | 0.99                                  |
| 11-OH-THC   | 20                     | Oral                    | 0.02                                  |
|             | 130                    | Oral                    | 0.10                                  |
|             | 160                    | Oral                    | 0.12                                  |
|             | 25                     | Inhalation              | 0.01                                  |
|             | 70                     | Inhalation              | 0.03                                  |
|             | 100                    | Inhalation              | 0.05                                  |
| 11-COOH-THC | 20                     | Oral                    | 0.19                                  |
|             | 130                    | Oral                    | 1.22                                  |
|             | 160                    | Oral                    | 1.50                                  |
|             | 25                     | Inhalation              | 0.07                                  |
|             | 70                     | Inhalation              | 0.18                                  |
|             | 100                    | Inhalation              | 0.26                                  |
| CBD         | 70                     | Oral                    | 0.09                                  |
|             | 700                    | Oral                    | 0.89                                  |
|             | 2000                   | Oral                    | 2.54                                  |
|             | 19                     | Inhalation              | 0.35 <sup>c</sup>                     |
| 7-OH-CBD    | 70                     | Oral                    | 0.03                                  |
|             | 700                    | Oral                    | 0.34                                  |

|      |            |                   |
|------|------------|-------------------|
| 2000 | Oral       | 0.98              |
| 19   | Inhalation | N.D. <sup>b</sup> |

<sup>a</sup> Doses and C<sub>max</sub> used to predict AUCR were reported from Bansal et al., 2022 [56]. Doses used for modeling 11-OH-THC and 7-OH-CBD were from administered doses of THC and CBD, respectively.

$C_{max,hepatic\ inlet,u} = f_{u,p} \times \left( C_{max} + \frac{F_a \times F_g \times K_a \times Dose}{Q_h \times R_p} \right)$ , where f<sub>u,p</sub> (unbound fraction in plasma) was set to 0.03 (Garrett and Hunt, 1974) [52], F<sub>a</sub> (fraction absorbed) and F<sub>g</sub> (dose that escapes gut metabolism) for THC and CBD were set to 1 (FDA Drug Interactions Guidance, 2020) [53], k<sub>a</sub> for both THC and CBD was set to 0.02 (Cox et al., 2019) [45], Q<sub>H</sub> (hepatic blood flow) – 1500 mL/min, and BP (blood to plasma ratio) for THC and CBD was set to 0.4 (Schwilke et al., 2009) [55]. <sup>b</sup> N.D., not determined. <sup>c</sup> Doses and C<sub>max</sub> used to predict AUCR were reported from Cox et al., 2019 [45].
